# Supplementary material for: H/F Substitution induced switchable coordination bonds in a cyano-bridged hybrid double perovskite ferroelastic
Source: Royal Society of Chemistry journal article supplement (doi:10.1039/d2cc00586g), 2022-01-01
Supplement: d2cc00586g1.pdf [file d2cc00586g1.pdf]

## Supporting Information

### H/F Substitution Induced Switchable Coordination Bonds in a Cyano-Bridged Hybrid Double Perovskite Ferroelastic

Xiao-Gang Chen,<sup>a</sup> Zhi-Xu Zhang,<sup>b</sup> Yu-Ling Zeng,<sup>a</sup> Shu-Yu Tang,<sup>a</sup> Ren-Gen Xiong<sup>\*ab</sup>

<sup>a</sup>Ordered Matter Science Research Center, Nanchang University, Nanchang 330031, P. R. China

Email: xiongrg@seu.edu.cn

<sup>b</sup>Jiangsu Key Laboratory for Science and Applications of Molecular Ferroelectrics, Southeast University, Nanjing 211189, P. R. China.

#### Methods

**Single-crystal X-ray diffraction.** Single-crystal X-ray diffraction data were measured using a Rigaku Saturn 924 diffractometer with Mo-K $\alpha$  radiation ( $\lambda = 0.71073 \text{ \AA}$ ). Data collection, cell refinement, and data reduction was performed using Rigaku CrystalClear 1.3.5. The structures were solved by direct methods and refined by the full-matrix method based on  $F^2$  using the SHELXTL software package. All non-hydrogen atoms were refined anisotropically and the positions of all hydrogen atoms were generated geometrically. The data collection and structure refinement of these crystals are summarized in Table S1. The X-ray crystallographic structures have been deposited at the Cambridge Crystallographic Data Centre (deposition numbers CCDC 2131140-2131141) and can be obtained free of charge from the CCDC via [www.ccdc.cam.ac.uk/getstructures](http://www.ccdc.cam.ac.uk/getstructures).

**Powder X-ray diffraction.** Powder X-ray diffraction (PXRD) data were measured using a Rigaku D/MAX 2000 PC X-ray diffraction system with Cu K $\alpha$  radiation in the  $2\theta$  range of  $5^\circ$ – $40^\circ$  with a step size of  $0.02^\circ$ .

**DSC and dielectric measurements.** Differential scanning calorimetry (DSC) measurements were recorded on a NETZSCH DSC 200F3 instrument by heating and cooling crystalline samples with a rate of  $10 \text{ K min}^{-1}$  in aluminum crucibles at nitrogen atmosphere. Complex dielectric permittivities were measured with a TH2828A impedance analyzer. The samples were made with a pressed-powder pellet for dielectric measurements. Silver conductive paste deposited on the plate surfaces of samples was used as top and bottom electrodes.

## Materials.

**Synthesis of TMFM-Cl.** Trimethylfluoromethyl ammonium chloride (TMFM-Cl) was synthesized by the reaction of equimolar amounts of trimethylamine (200 mmol, 30 wt % in water) and chlorofluoromethane (200 mmol) in ethanol (200 ml) at room temperature for 72h with stirring. Colorless solid samples of TMFM-Cl (70% yield) were obtained after the removal of the solvents under reduced pressure. Dried sample of TMFM-Cl was stored in a vacuum desiccator.

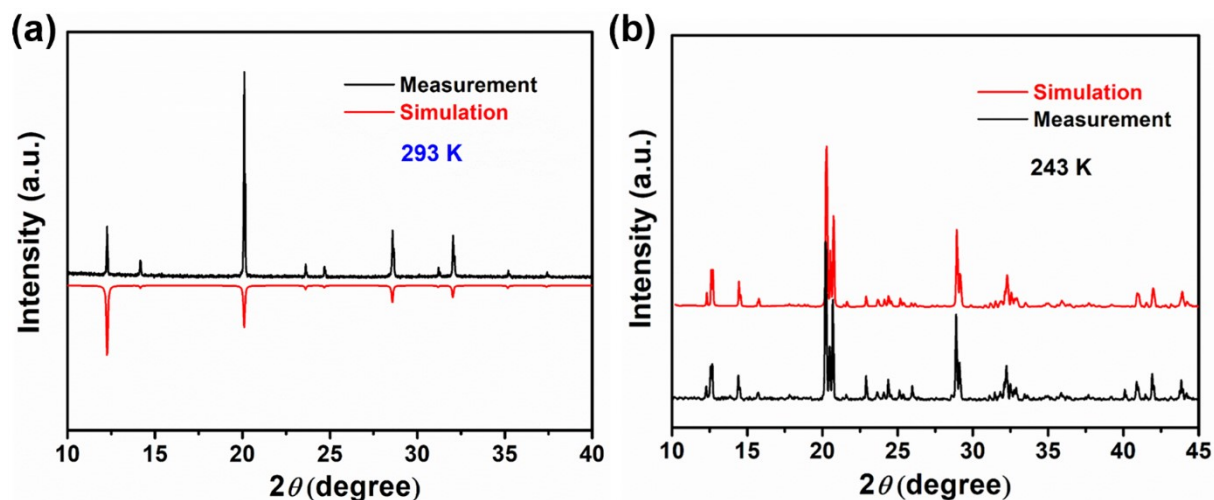

**Fig. S1** PXR D patterns of TMFM-1 in (a) HTP and (b) LTP match well with those simulated from the single-crystal structures.

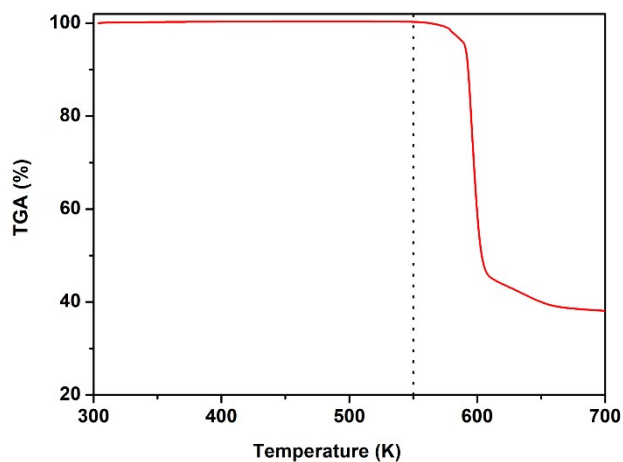

**Fig. S2** TGA curve of TMFM-1.

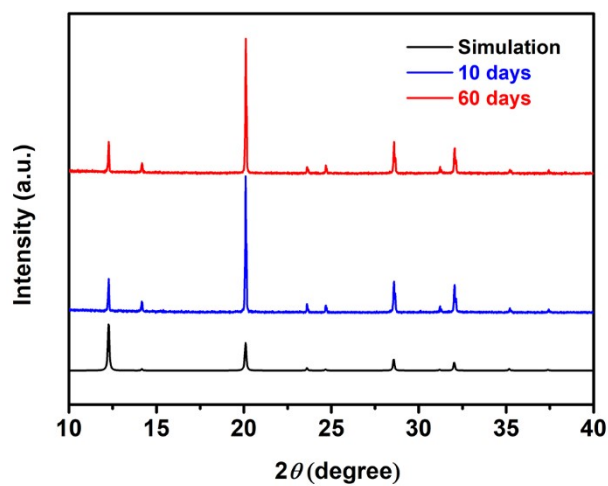

**Fig. S3** PXRd patterns of TMFM-1 recorded after 10/60 days upon exposure to air at room temperature.

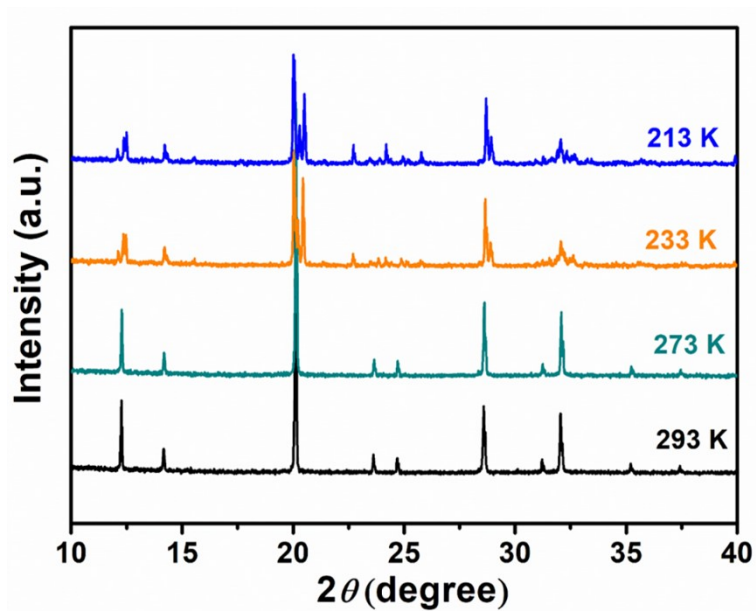

**Fig. S4** Variable temperature PXRd patterns of TMFM-1.

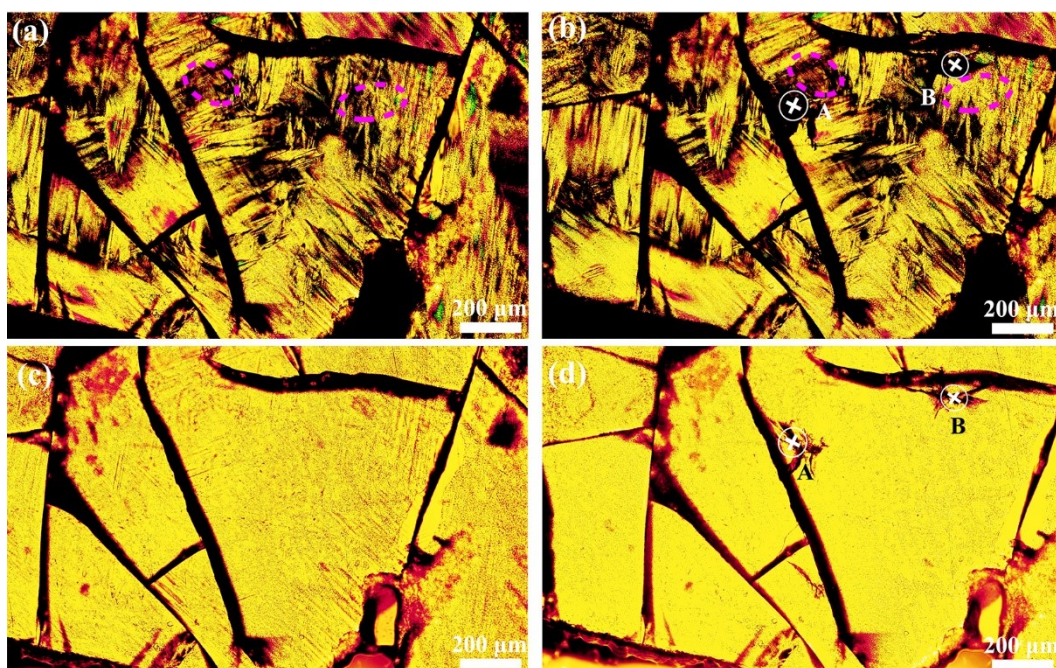

**Fig. S5** (a, b) The observation of ferroelastic domains variation at 243 K before (a) and after (b) applying external strain. (c, d) Crystal surface morphology variation before (c) and after (d) applying external strain. The circle "x" indicates the position where the force is applied, the scale bar is 200  $\mu\text{m}$ . There is a clear ferroelastic domains change at the red circle A and B, after applying external strain.

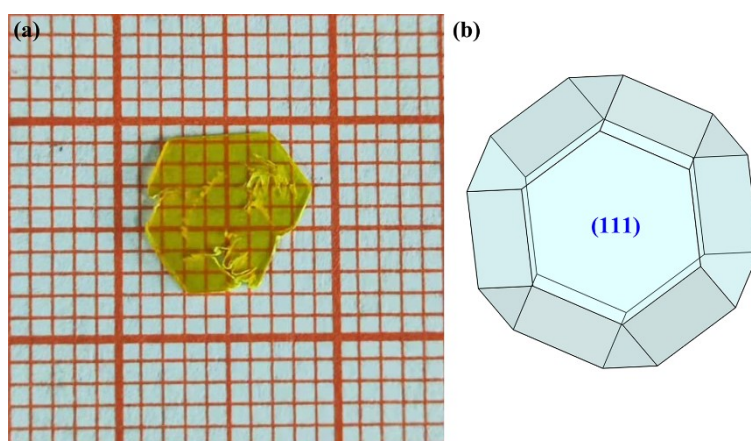

**Fig. S6** The single crystal with a crystallographic orientation perpendicular to the (111) plane (a) and the simulated morphology of  $[(\text{CH}_3)_3\text{NCH}_2\text{F}]_2[\text{KFe}(\text{CN})_6]$  at 300 K.

**Table S1.** Crystal data and structural refinements for TMFM-1 at 243 K and 300 K.

| Temperature                | 243 K                                                              | 300 K                                                              |
|----------------------------|--------------------------------------------------------------------|--------------------------------------------------------------------|
| Formula                    | $[(\text{CH}_3)_3\text{NCH}_2\text{F}]_2[\text{KFe}(\text{CN})_6]$ | $[(\text{CH}_3)_3\text{NCH}_2\text{F}]_2[\text{KFe}(\text{CN})_6]$ |
| Weight                     | 435.35                                                             | 435.35                                                             |
| System                     | Monoclinic                                                         | Cubic                                                              |
| Space group                | <i>C2/c</i>                                                        | <i>Fm-3m</i>                                                       |
| <i>a</i> (Å)               | 15.210(3)                                                          | 12.4857(3)                                                         |
| <i>b</i> (Å)               | 8.7181(11)                                                         | 12.4857(3)                                                         |
| <i>c</i> (Å)               | 15.206(3)                                                          | 12.4857(3)                                                         |
| $\alpha$ (°)               | 90.00                                                              | 90.00                                                              |
| $\beta$ (°)                | 109.26(2)                                                          | 90.00                                                              |
| $\gamma$ (°)               | 90.00                                                              | 90.00                                                              |
| <i>V</i> (Å <sup>3</sup> ) | 1903.5(6)                                                          | 1946.43(14)                                                        |
| <i>Z</i>                   | 4                                                                  | 4                                                                  |
| <i>R</i> <sub>1</sub>      | 0.1657                                                             | 0.0424                                                             |
| w <i>R</i> <sub>2</sub>    | 0.3018                                                             | 0.1369                                                             |
| GOF                        | 1.057                                                              | 1.046                                                              |

Table S2 in revision. Summary of cyano-bridged dimetallic complexes with ferroelasticity.

| Compound                                                                                  | Symmetry change                     | Ferroelastic domain | Reference        |
|-------------------------------------------------------------------------------------------|-------------------------------------|---------------------|------------------|
| [CH <sub>3</sub> NH <sub>3</sub> ] <sub>2</sub> [KFe(CN) <sub>6</sub> ]                   | <i>m-3mF2/m</i>                     | not observed        | 1                |
| [(CH <sub>3</sub> ) <sub>2</sub> NH <sub>2</sub> ] <sub>2</sub> [KFe(CN) <sub>6</sub> ]   | <i>m-3mF4/mmm</i>                   | not observed        | 1                |
| [(CH <sub>3</sub> ) <sub>3</sub> NH] <sub>2</sub> [KFe(CN) <sub>6</sub> ]                 | <i>m-3mF2/m</i>                     | not observed        | 1                |
| [(CH <sub>3</sub> ) <sub>4</sub> N] <sub>2</sub> [KFe(CN) <sub>6</sub> ]                  | <i>m-3m</i> to <i>4/m</i>           | non-ferroelastic    | 1                |
| [formamidinium] <sub>2</sub> [KFe(CN) <sub>6</sub> ]                                      | <i>m-3mF-1</i>                      | not observed        | 2                |
| [formamidinium] <sub>2</sub> [KCo(CN) <sub>6</sub> ]                                      | <i>m-3mF-1</i>                      | not observed        | 2                |
| [(CH <sub>3</sub> ) <sub>3</sub> NOH] <sub>2</sub> [KFe(CN) <sub>6</sub> ]                | <i>m-3m</i> to <i>m</i>             | not observed        | 3, 4             |
| [C(NH <sub>2</sub> ) <sub>3</sub> ] <sub>2</sub> [KFe(CN) <sub>6</sub> ]                  | <i>m-3mF-3m</i>                     | not observed        | 5                |
| [CH <sub>3</sub> C(NH <sub>2</sub> ) <sub>2</sub> ] <sub>2</sub> [KFe(CN) <sub>6</sub> ]  | <i>m-3mF-3m</i> , <i>m-3mF2/m</i>   | observed            | 5, 6             |
| [CH <sub>3</sub> C(NH <sub>2</sub> ) <sub>2</sub> ] <sub>2</sub> [KCo(CN) <sub>6</sub> ]  | <i>m-3mF-3m</i> , <i>m-3mF2/m</i>   | observed            | 6                |
| [CH <sub>3</sub> C(NH <sub>2</sub> ) <sub>2</sub> ] <sub>2</sub> [KCr(CN) <sub>6</sub> ]  | <i>m-3mF-3m</i> , <i>m-3mF2/m</i>   | observed            | 6                |
| (imidazolium) <sub>2</sub> [KFe(CN) <sub>6</sub> ]                                        | <i>-3mF2/m</i>                      | not observed        | 7                |
| (imidazolium) <sub>2</sub> [KCo(CN) <sub>6</sub> ]                                        | <i>-3mF2/m</i>                      | not observed        | 8                |
| (imidazolium) <sub>2</sub> [KFe <sub>0.42</sub> Co <sub>0.58</sub> (CN) <sub>6</sub> ]    | <i>-3mF2/m</i>                      | observed            | 9                |
| [(CH <sub>3</sub> ) <sub>3</sub> NH] <sub>2</sub> [KCo(CN) <sub>6</sub> ]                 | <i>m-3mF2/m</i>                     | not observed        | 10               |
| [(CH <sub>3</sub> ) <sub>2</sub> NH <sub>2</sub> ] <sub>2</sub> [KCo(CN) <sub>6</sub> ]   | <i>4/mmm</i> to <i>4/mmm</i>        | non-ferroelastic    | 11               |
| [(CH <sub>3</sub> ) <sub>2</sub> ND <sub>2</sub> ] <sub>2</sub> [KCo(CN) <sub>6</sub> ]   | <i>4/mmm</i> to <i>4/mmm</i>        | non-ferroelastic    | 11               |
| [CH <sub>3</sub> NH <sub>3</sub> ] <sub>2</sub> [KCo(CN) <sub>6</sub> ]                   | <i>m-3mF2/m</i>                     | not observed        | 12               |
| [CH <sub>3</sub> NH <sub>3</sub> ] <sub>2</sub> [NaCo(CN) <sub>6</sub> ]                  | <i>m-3mF2/m</i>                     | not observed        | 13               |
| [C <sub>3</sub> H <sub>6</sub> NH <sub>2</sub> ] <sub>2</sub> [KCo(CN) <sub>6</sub> ]     | <i>m-3m</i> to <i>m-3m</i>          | non-ferroelastic    | 14               |
| [CH <sub>3</sub> NH <sub>3</sub> ] <sub>2</sub> [KCr(CN) <sub>6</sub> ]                   | <i>m-3mF2/m</i>                     | observed            | 15               |
| [(CH <sub>3</sub> ) <sub>2</sub> NH <sub>2</sub> ] <sub>2</sub> [KCr(CN) <sub>6</sub> ]   | <i>m-3mF4/mmm</i>                   | observed            | 16               |
| (imidazolium) <sub>2</sub> [RbCo(CN) <sub>6</sub> ]                                       | <i>3m</i> to <i>3</i> to <i>2/m</i> | non-ferroelastic    | 17               |
| [(CH <sub>3</sub> ) <sub>4</sub> N] <sub>2</sub> [KHg(CN) <sub>6</sub> ]                  | <i>-43m</i> to <i>-4</i>            | non-ferroelastic    | 18               |
| [Pyrrolidinium] <sub>2</sub> [KFe(CN) <sub>6</sub> ]                                      | <i>-3mF2/m</i>                      | not observed        | 19               |
| [Pyrrolidinium] <sub>2</sub> [KCo(CN) <sub>6</sub> ]                                      | <i>-3mF2/m</i>                      | not observed        | 19               |
| [Pyrrolidinium] <sub>2</sub> [KCr(CN) <sub>6</sub> ]                                      | <i>m-3mF?</i>                       | not observed        | 20               |
| [(CH <sub>3</sub> ) <sub>3</sub> NOH] <sub>2</sub> [KCo(CN) <sub>6</sub> ]                | <i>m-3m</i> to <i>m</i>             | observed            | 4, 21            |
| [(CH <sub>3</sub> ) <sub>3</sub> NCH <sub>2</sub> F] <sub>2</sub> [KFe(CN) <sub>6</sub> ] | <b><i>m-3mF2/m</i></b>              | <b>observed</b>     | <b>this work</b> |

## References

1. W.-J. Xu, S.-L. Chen, Z.-T. Hu, R.-B. Lin, Y.-J. Su, W.-X. Zhang and X.-M. Chen, *Dalton Trans.*, 2016, **45**, 4224 - 4229.
2. M. Trzebiatowska, A. Gagor, L. Macalik, P. Peksa and A. Sieradzki, *Dalton Trans.*, 2019, **48**, 15830-15840.
3. W. J. Xu, P. F. Li, Y. Y. Tang, W. X. Zhang, R. G. Xiong and X. M. Chen, *J. Am. Chem. Soc.*, 2017, **139**, 6369-6375.
4. M. Rok, A. Cizman, B. Zarychta, J. K. Zareba, M. Trzebiatowska, M. Maczka, A. Stroppa, S. Yuan, A. E. Phillips and G. Bator, *J. Mater. Chem. C*, 2020, **8**, 17491-17501.
5. W.-J. Xu, K.-P. Xie, Z.-F. Xiao, W.-X. Zhang and X.-M. Chen, *Cryst. Growth Des.*, 2016, **16**, 7212-7217.
6. M. Rok, G. Bator, B. Zarychta, B. Dziuk, D. K. Skalecki, W. Medycki and M. Zamponi, *Cryst. Growth Des.*, 2019, **19**, 4526-4537.
7. W. Zhang, Y. Cai, R.-G. Xiong, H. Yoshikawa and K. Awaga, *Angew. Chem., Int. Ed.*, 2010, **49**, 6608-6610.
8. X. Zhang, X. D. Shao, S. C. Li, Y. Cai, Y. F. Yao, R. G. Xiong and W. Zhang, *Chem. Commun.*, 2015, **51**, 4568-4571.
9. M. Rok, M. Moskwa, A. Pawlukojć, R. Janicki, I. Zuba, P. Zieliński, P. Sobieszczyk and G. Bator, *Dalton Trans.*, 2020, **49**, 5503-5512.
10. M. Rok; B. Zarychta,; M. Moskwa, B. Dziuk, W. Medycki and G. Bator, *Dalton Trans.*, 2020, **49**, 1830-1838.
11. W. Zhang, H.-Y. Ye, R. Graf, H. W. Spiess, Y.-F. Yao, R.-Q. Zhu and R.-G. Xiong, *J. Am. Chem. Soc.*, 2013, **135**, 5230-5233.
12. C. Shi, C. H. Yu and W. Zhang, *Angew. Chem., Int. Ed.*, 2016, **55**, 5798-5802.
13. J. Wang, X. Zhang, R. Graf, Y. Li, G. Yang, X. B. Fu, J. Q. Ma and Y. F. Yao, *Inorg. Chem.*, 2019, **58**, 7426-7432.
14. K. Qian, F. Shao, Z. H. Yan, J. Pang, X. D. Chen and C. X. Yang, *CrystEngComm*, 2016, **18**, 7671-7674.
15. M. Rok, M. Moskwa, M. Działowa, A. Bieńko, C. Rajnák, R. Boča and G. Bator, *Dalton Trans.*, 2019, **48**, 16650-16660.
16. M. Rok, G. Bator, B. Zarychta, B. Dziuk, J. Repec, W. Medycki, M. Zamponi, G. Usevicius, M. Simenas and J. Banys, *Dalton Trans.*, 2019, **48**, 4190-4202.
17. C. Shi, Z.-X. Gong, Q.-W. Wang, X.-B. Han and W. Zhang, *CrystEngComm*, 2020, **22**, 1848-1852.
18. G. Thiele, J. Grossmann and A. W. Purzer, *B: J. Chem. Sci.*, 1986, **41**, 1346-1352.
19. M. Trzebiatowska, M. Maczka, A. Gagor and A. Sieradzki, *Inorg. Chem.*, 2020, **59**, 8855-8863.
20. M. Maczka, A. Nowok, J. K. Zareba, D. Stefanska, A. Gagor, M. Trzebiatowska and A. Sieradzki, *ACS Appl. Mater. Interfaces*, 2022, **14**, 1460-1471.
21. W.-J. Xu, K. Romanyuk, Y. Zeng, A. Ushakov, V. Shur, A. Tselev, W.-X. Zhang, X.-M. Chen, A. Kholkin and J. Rocha, *J. Mater. Chem. C*, 2021, **9**, 10741-10748.
